# Supplementary material for: Ultrafine PDMS fibers: preparation from in situ curing-electrospinning and mechanical characterization
Source: Royal Society of Chemistry journal article supplement (doi:10.1039/c4ra00232f), 2014-01-01
Supplement: c4ra00232f1.pdf [file c4ra00232f1.pdf]

# Ultrafine PDMS fibers: preparation from in situ curing-electrospinning and mechanical characterization

Haitao Niu, Hongxia Wang, Hua Zhou, Tong Lin\*

Institute for Frontier Materials, Deakin University, Geelong, VIC3216, Australia

## Electronic Supplementary Information

---

\* Corresponding author, Fax: +61 3 52271245; email: [tong.lin@deakin.edu.au](mailto:tong.lin@deakin.edu.au)

**S1:** TGA results of PDMS/PVP and PDMS fibers.

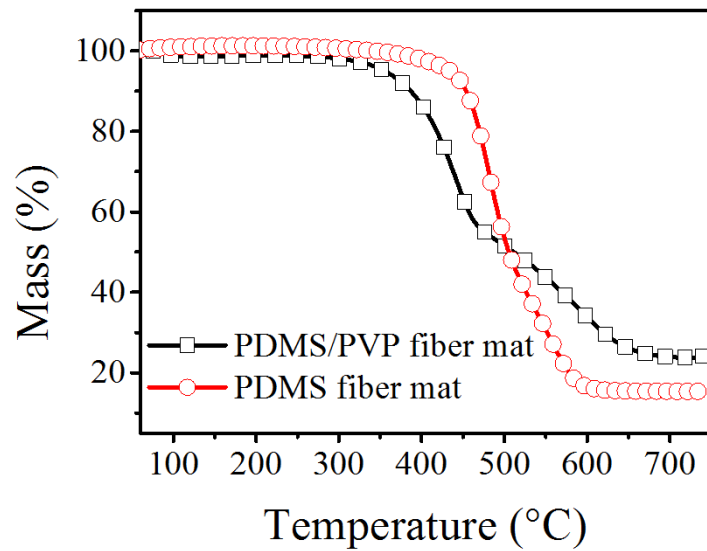

**Fig. S1** TGA curves of PDMS/PVP and PDMS fibers.

**S2:** PDMS fiber diameter at different elongation rates.

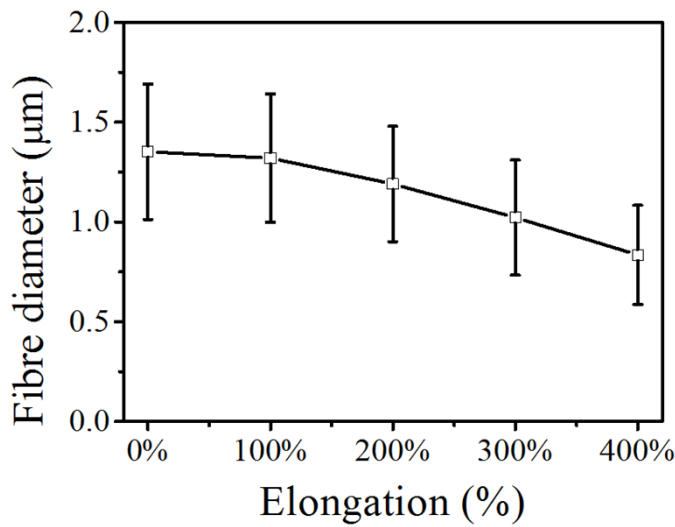

**Fig. S2** Influence of elongation ratio on PDMS fiber diameter.
